# Supplementary material for: Cardiac Structure and Cardiorespiratory Fitness in Young Male Japanese Rugby Athletes
Source: MDPI journal article supplement (doi:10.3390/jcdd10010012), 2023-01-01
Supplement: s1 [file s1]

**Table S1:** Comparison of echocardiographic parameters between young Japanese rugby athletes and a general Japanese population in their twenties

|                                | Young Japanese rugby athletes<br>(n=114) | Reference data from Japanese<br>participants in their twenties * |
|--------------------------------|------------------------------------------|------------------------------------------------------------------|
| LVEDD (mm)                     | 53.0±3.3                                 | 49±4                                                             |
| LVEDD/BSA (mm/m <sup>2</sup> ) | 26.6±2.0                                 | 27±2                                                             |
| LVESD (mm)                     | 33.2±3.2                                 | 31±4                                                             |
| LVESD/BSA (mm/m <sup>2</sup> ) | 16.7±1.8                                 | 18±2                                                             |
| IVSth (mm)                     | 10.3±0.8                                 | 8±1                                                              |
| PWth (mm)                      | 10.1±0.9                                 | 8±1                                                              |
| RWT                            | 0.38±0.04                                | NA                                                               |
| LVEDV (ml)                     | 150.2±26.4                               | 102±22                                                           |
| LVEDV/BSA (ml/m <sup>2</sup> ) | 75.0±11.4                                | 58±11                                                            |
| LVESV (ml)                     | 53.9±10.8                                | 38±11                                                            |
| LVESV/BSA (ml/m <sup>2</sup> ) | 27.0±5.0                                 | 21±6                                                             |
| LVM (g)                        | 206.7±34.9                               | 130±26                                                           |
| LVM/BSA (g/m <sup>2</sup> )    | 102.4±14.5                               | 74±14                                                            |
| LAD (mm)                       | 36.5±3.9                                 | 31±4                                                             |
| RAD (mm)                       | 41.3±4.9                                 | 37±5                                                             |
| LAV/BSA (ml/m <sup>2</sup> )   | 28.4±6.4                                 | 24±8                                                             |
| AOD (mm)                       | 30.9±2.6                                 | 29±3                                                             |
| AOD/BSA (mm/m <sup>2</sup> )   | 15.5±1.6                                 | 17±2                                                             |
| LVEF (%)                       | 64.4±4.3                                 | NA                                                               |
| E/A                            | 2.3±0.5                                  | 2.0±0.5                                                          |
| E/e'                           | 6.3±1.3                                  | 4.8±1.5                                                          |
| GLS (%)                        | -17.8±1.4                                | NA                                                               |

AOD, aortic root dimension; BSA, body surface area; GLS, global longitudinal strain; IVSth,

thickness of interventricular septum; LAD, left atrial dimension; LAV, left atrial volume; LVEDD, left ventricular (LV) end-diastolic dimension; LVEDV, end-diastolic volume; LVEF, LV ejection fraction; LVESD, LV end-systolic dimension; LVESV, end-systolic volume; LVM, LV mass; PWth, posterior wall thickness; RAD, right atrial dimension; RWT, relative wall thickness. \*, data were derived from the JAMP study (Ref. 18). NA, data was not available.
